# Supplementary material
Source: PubMed Central journal article supplement (PMC8886609)

## Supporting Information

### Modular Design of Membrane Active Antibiotics: From Macromolecular Antimicrobials to Small Scorpion-like Peptidomimetics

Minghui Wang<sup>1,‡</sup>, Xiaoqian Feng<sup>2,3,‡</sup>, Ruixuan Gao<sup>1</sup>, Peng Sang<sup>1</sup>, Xin Pan<sup>3</sup>, Lulu Wei<sup>1</sup>, Chao Lu<sup>2,\*</sup>, Chuanbin Wu<sup>2,\*</sup>, and Jianfeng Cai<sup>1,\*</sup>

<sup>1</sup>Department of Chemistry, University of South Florida, Tampa, FL 33620, USA

<sup>2</sup>College of Pharmacy, Jinan University, Guangzhou, Guangdong 511443, China

<sup>3</sup>Department of Pharmaceutics, Sun Yat-Sen University, Guangzhou, Guangdong 510006, China

\*Corresponding author email: chaolu@jnu.edu.cn, chuanbin\_wu@126.com, jianfengcai@usf.edu

|                                                                                              |        |
|----------------------------------------------------------------------------------------------|--------|
| Time-kill kinetics of compound <b>12</b> and ciprofloxacin against <i>E. coli</i> .....      | S2     |
| <i>E. coli</i> biofilm inhibition by compound <b>12</b> .....                                | S2     |
| Drug resistance study of compound <b>12</b> against <i>E. coli</i> .....                     | S3     |
| <sup>1</sup> H NMR, <sup>13</sup> C NMR and HPLC traces of intermediates and compounds ..... | S4-S35 |

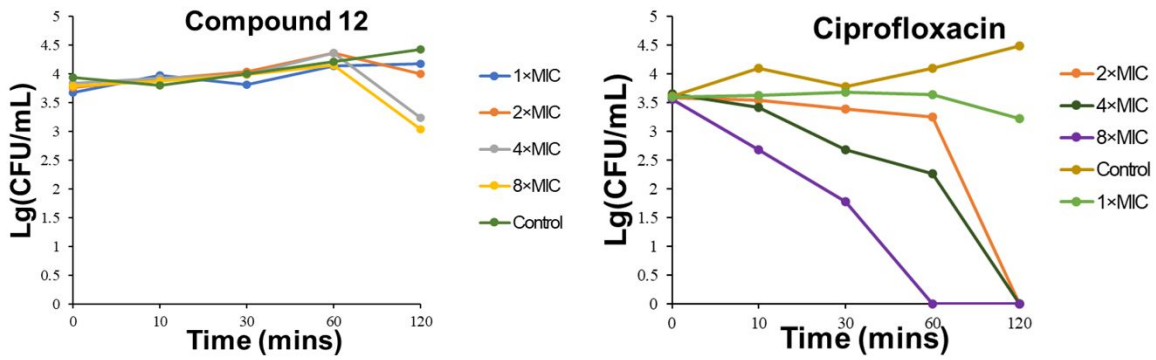

**Figure S1.** Time-kill Time-kill kinetic curves of compound 12 and ciprofloxacin. Controls were untreated MRSA.

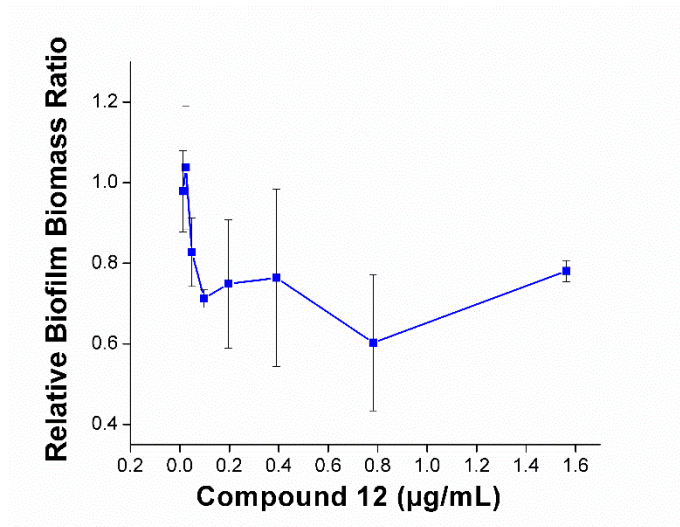

**Figure S2.** MRSA biofilm inhibition by compound 12.

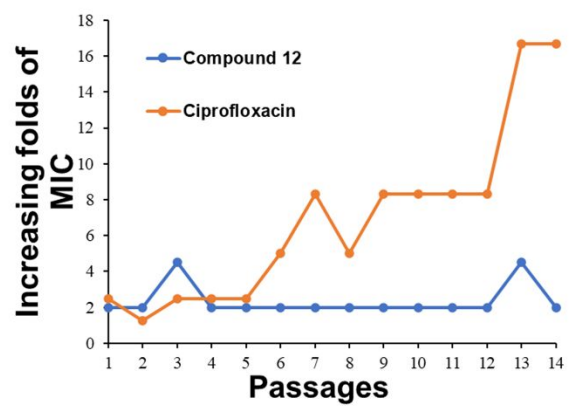

**Figure S3.** Propensity of developing drug resistance of compound 12 and ciprofloxacin against *E. coli*.

*tert*-Butyl(S)-(2-(((9H-fluoren-9-yl)methoxy)carbonyl)amino)-6-((*tert*-butoxycarbonyl)amino)hexyl) glycinate.

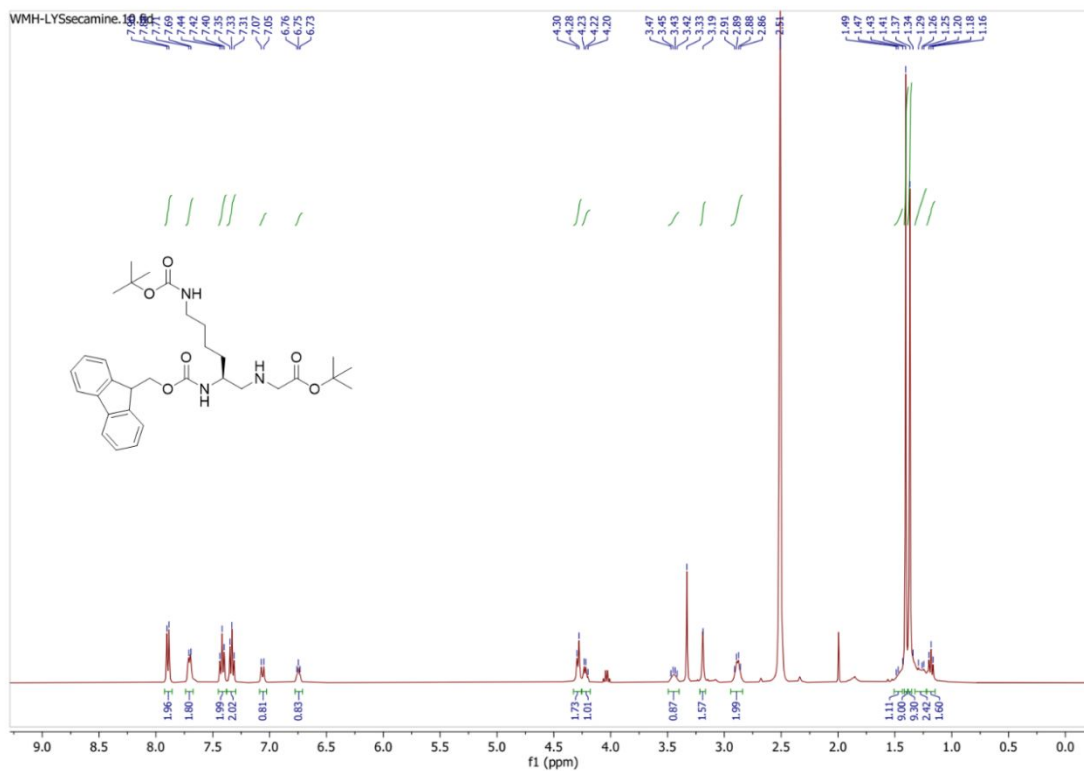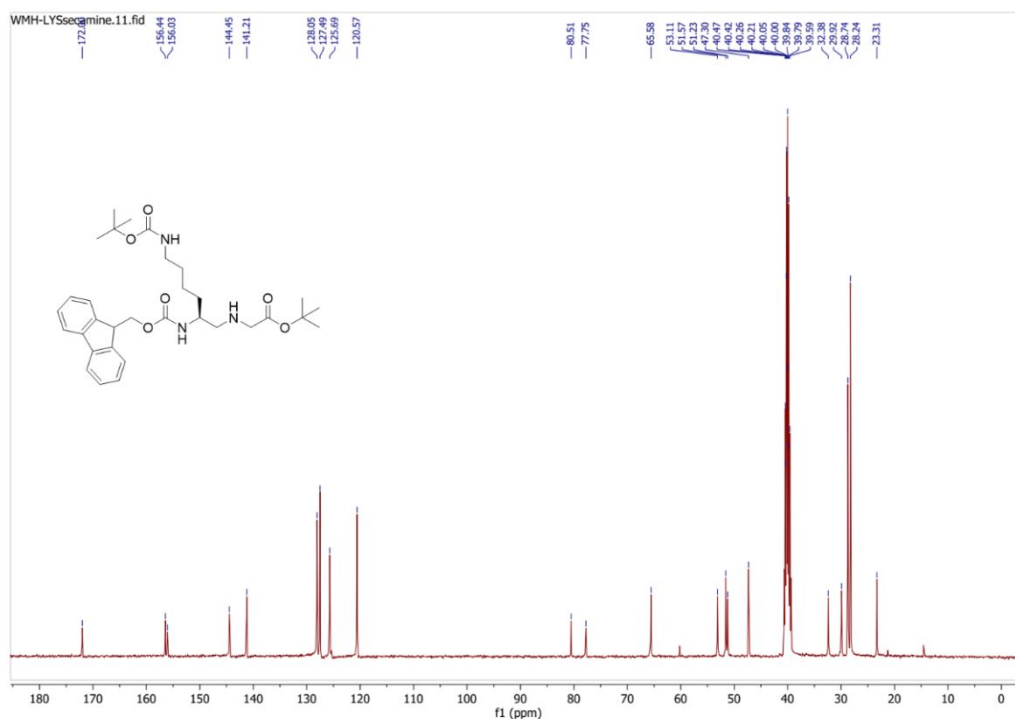

Di(9H-fluoren-9-yl)(5-((2-((tert-butoxycarbonyl) amino)ethyl)carbamoyl)-1,3-phenylene)dicarbamate.

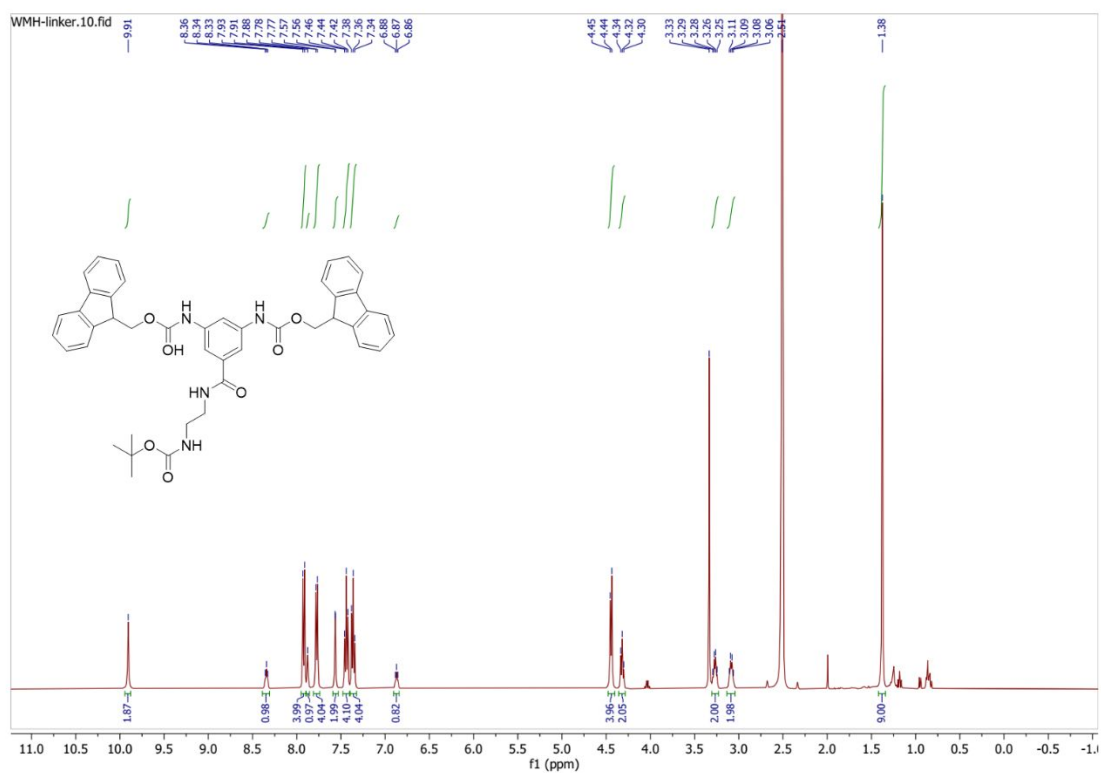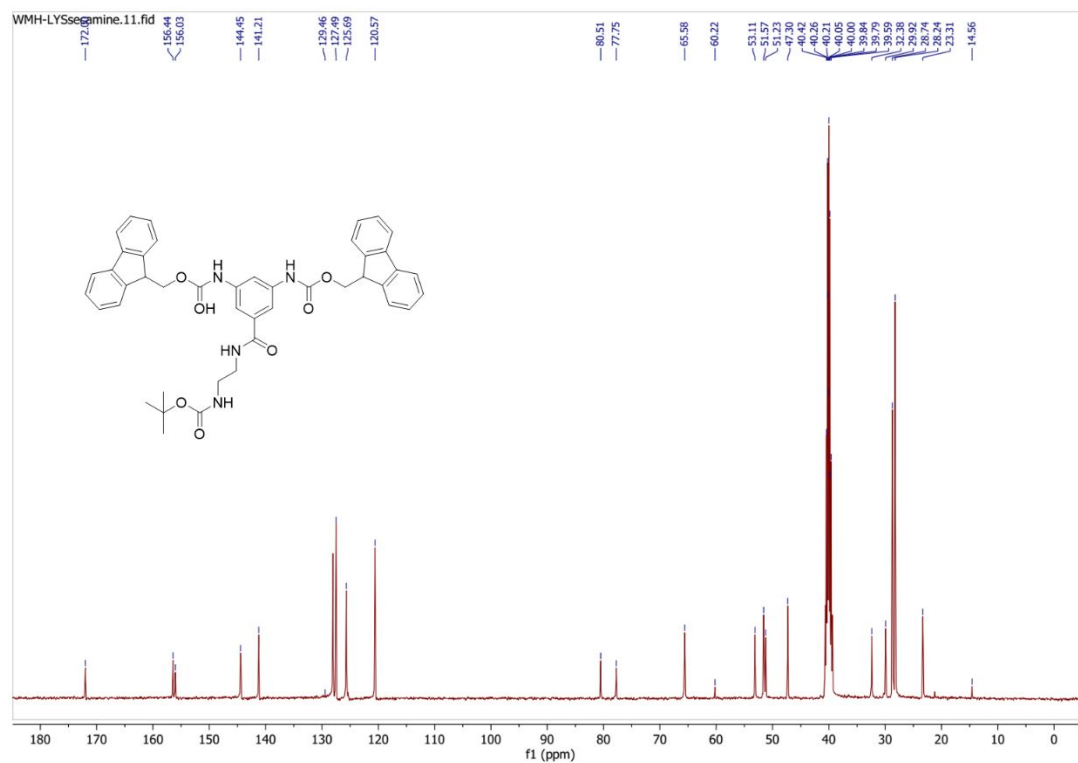

*N,N'*-(((5-((2-octanamidoethyl)carbamoyl)-1,3-phenylene)bis(azanediy))bis(2-oxoethane-2,1-diy))bis(*N*-((*S*)-2,6-diaminohexyl)hexanamide) (**1**).

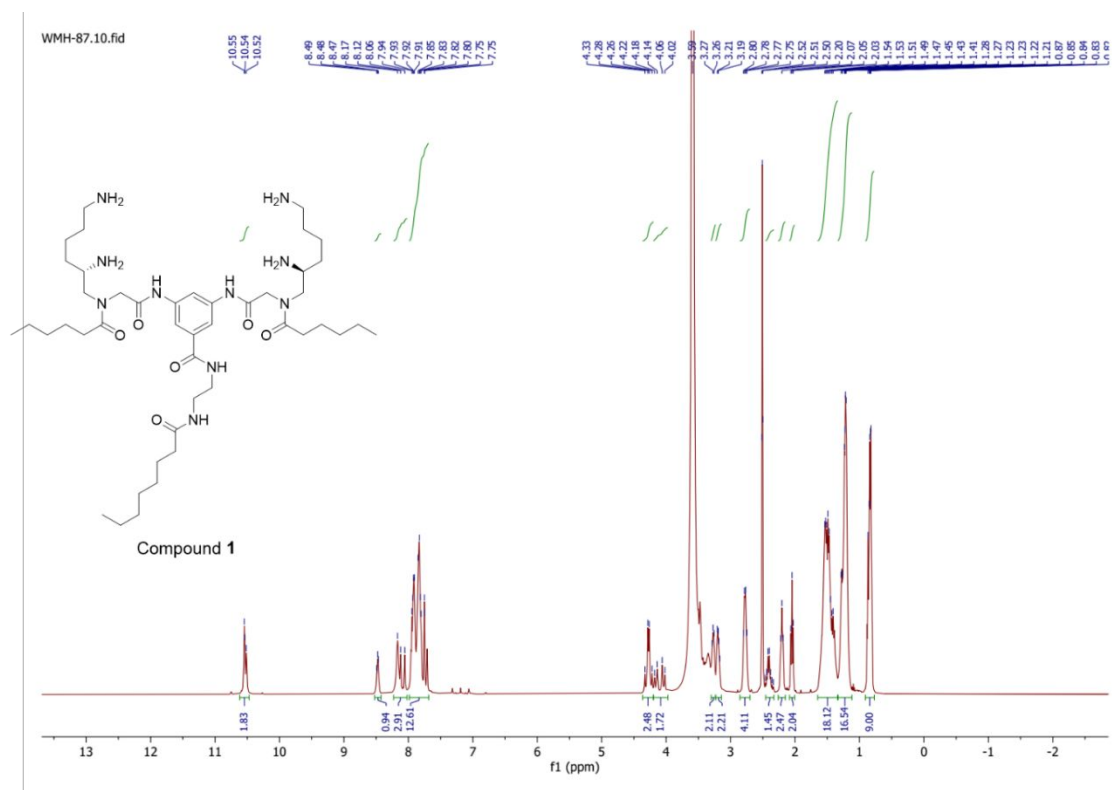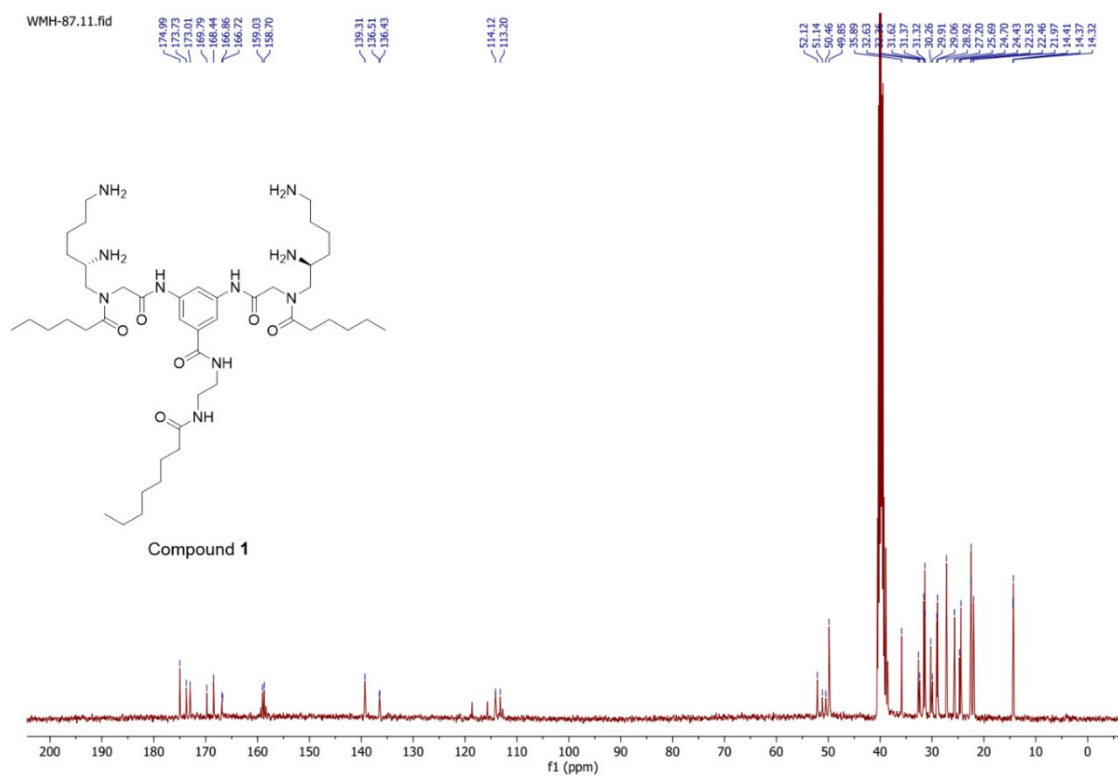

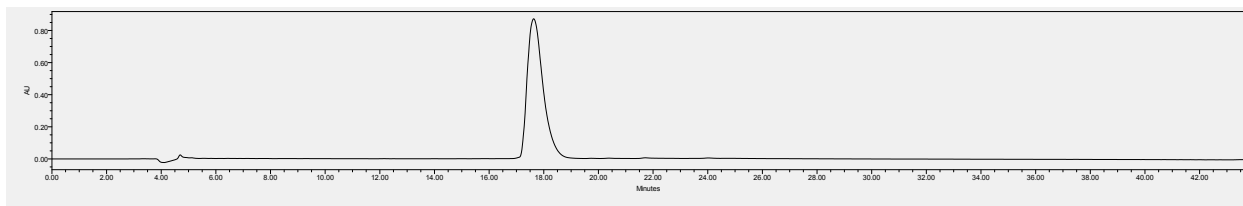

*N,N'*-(((5-((2-octanamidoethyl)carbamoyl)-1,3-phenylene)bis(azanediyl))bis(2-oxoethane-2,1-diy))bis(*N*-((*S*)-2,6-diaminohexyl)octanamide) (**2**).

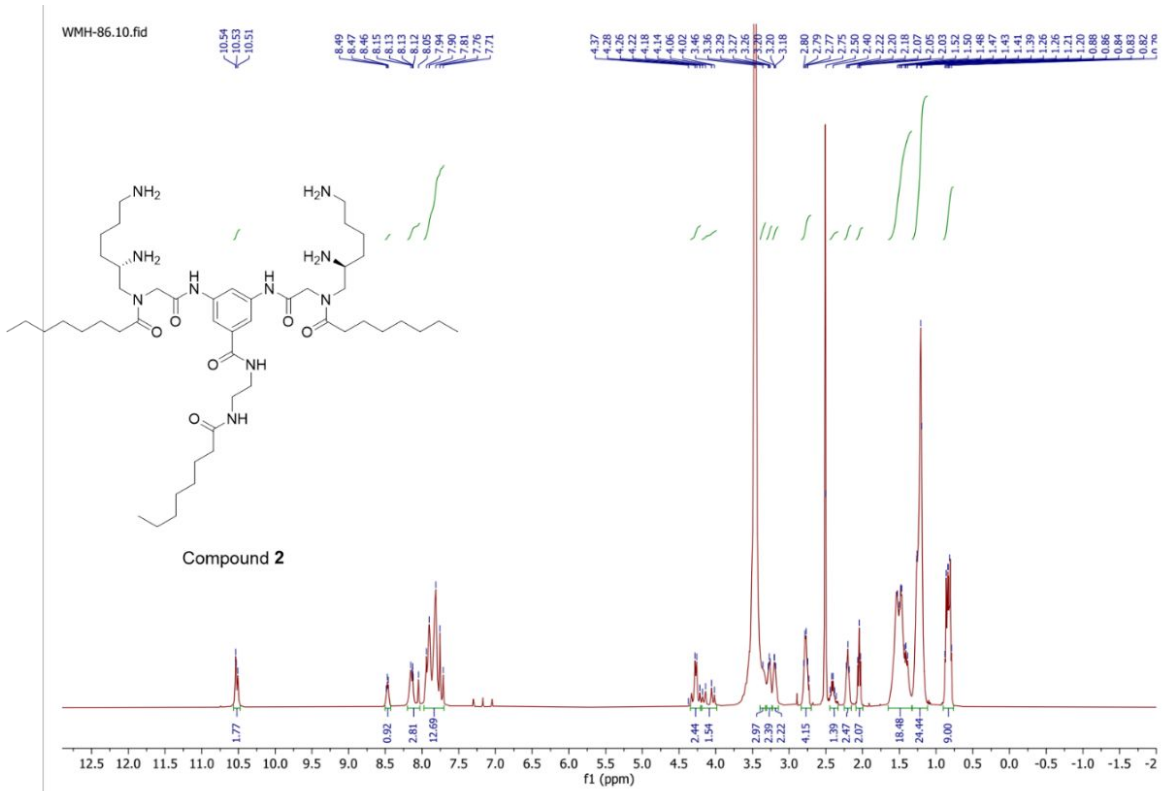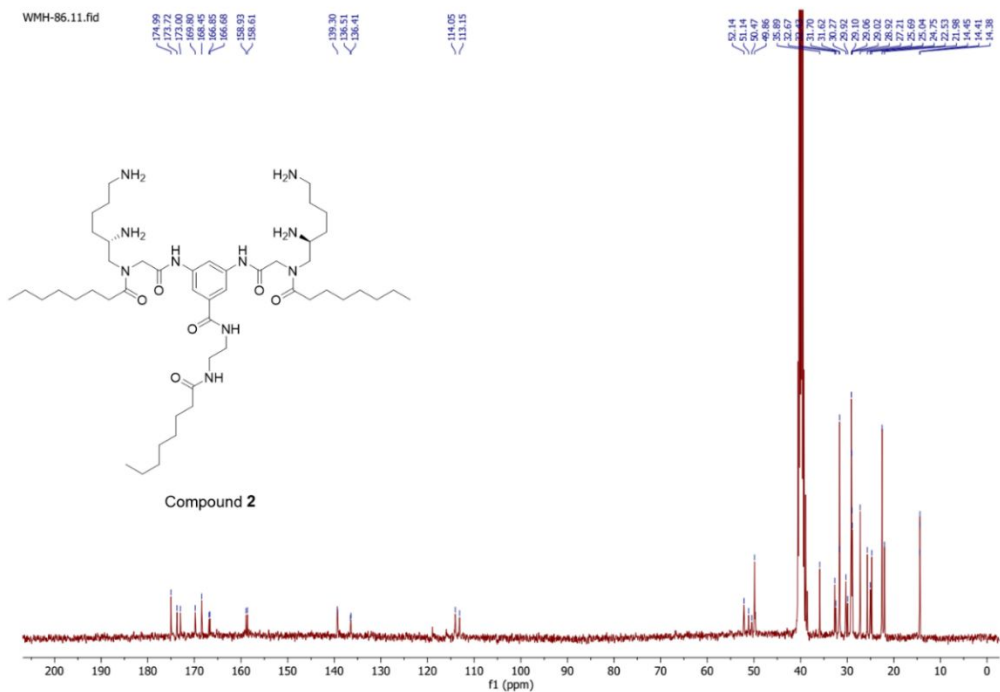



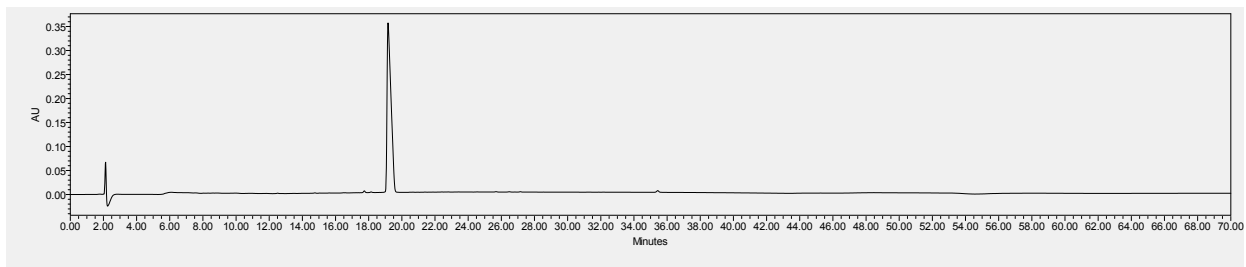



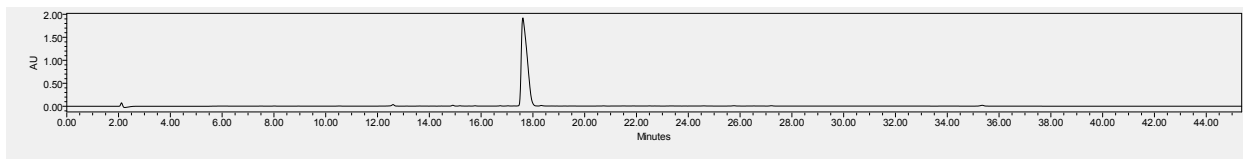

*N,N'*-(((5-((2-octanamidoethyl)carbamoyl)-1,3-phenylene)bis(azanediy1))bis(2-oxoethane-2,1-diy1))bis(*N*-((*S*)-2,6-diaminohexyl)-[1,1'-biphenyl]-4-carboxamide) (**4**).

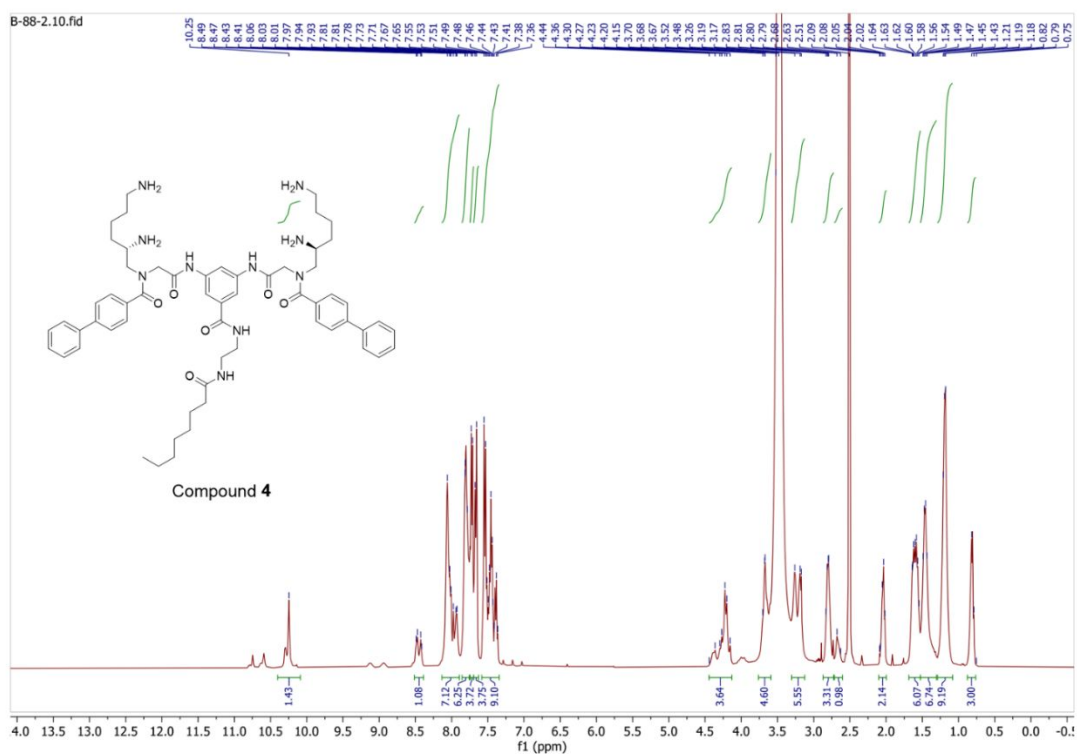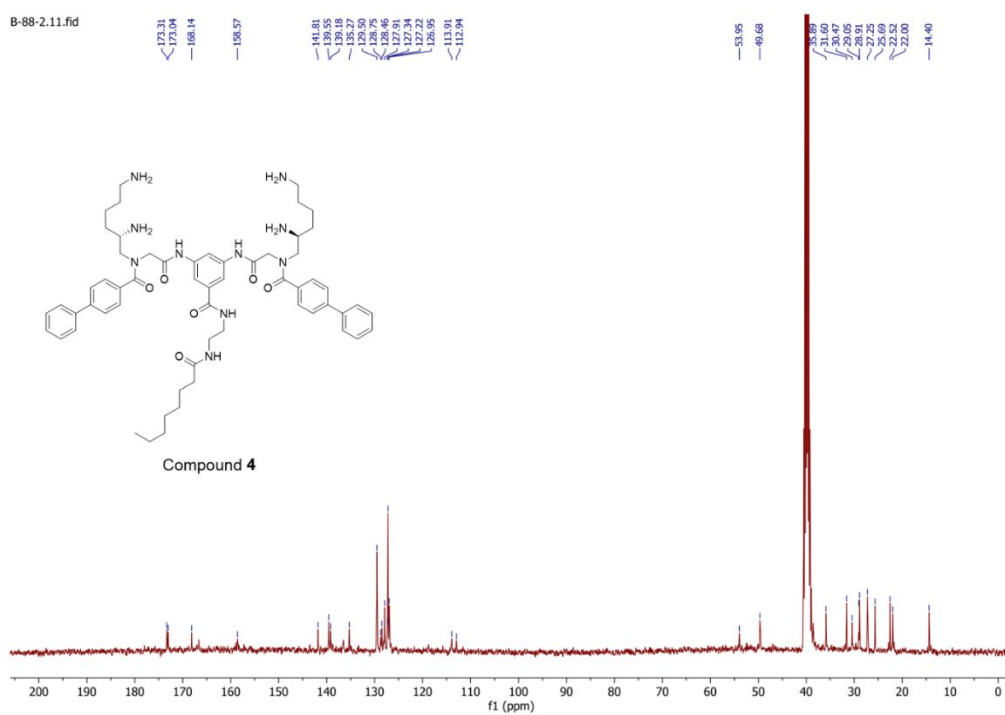

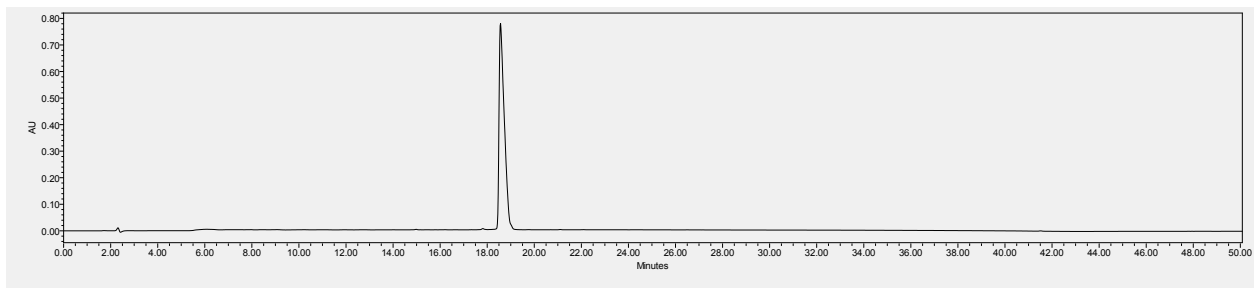

*N,N'*-(((5-((2-octanamidoethyl)carbamoyl)-1,3-phenylene)bis(azanediy))bis(2-oxoethane-2,1-diy))bis(4-chloro-*N*-((*S*)-2,6-diaminohexyl)benzamide) (**5**).

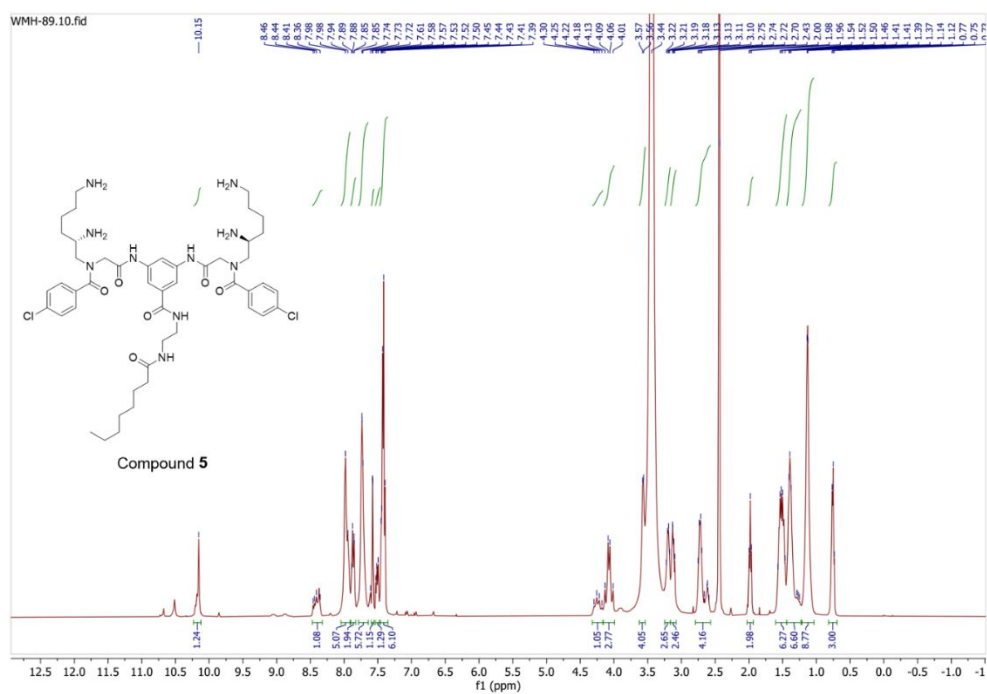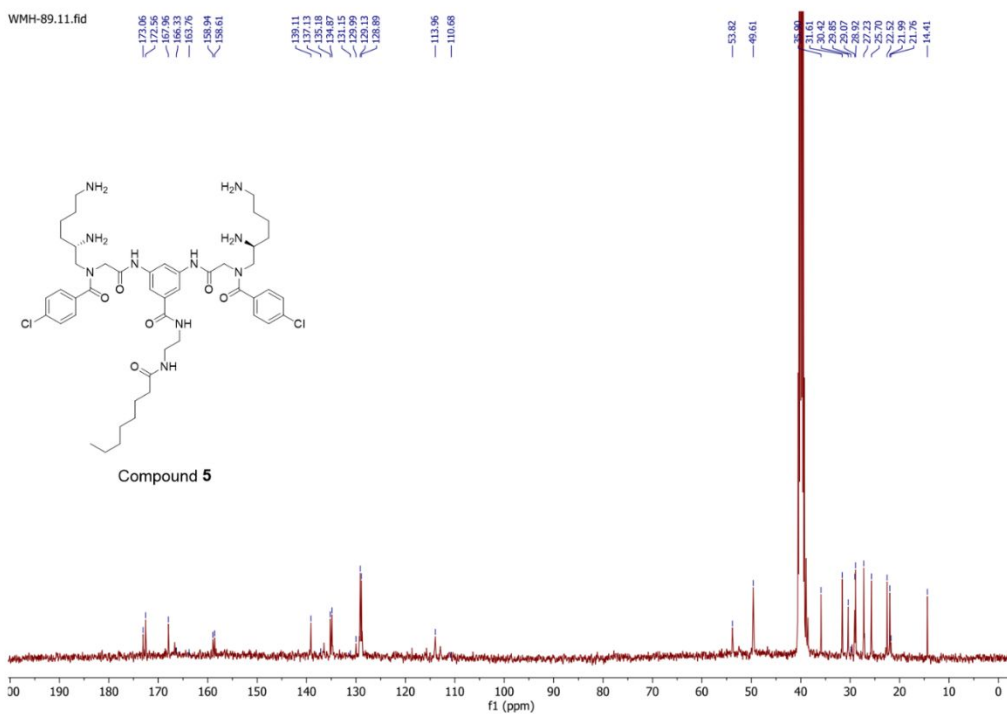

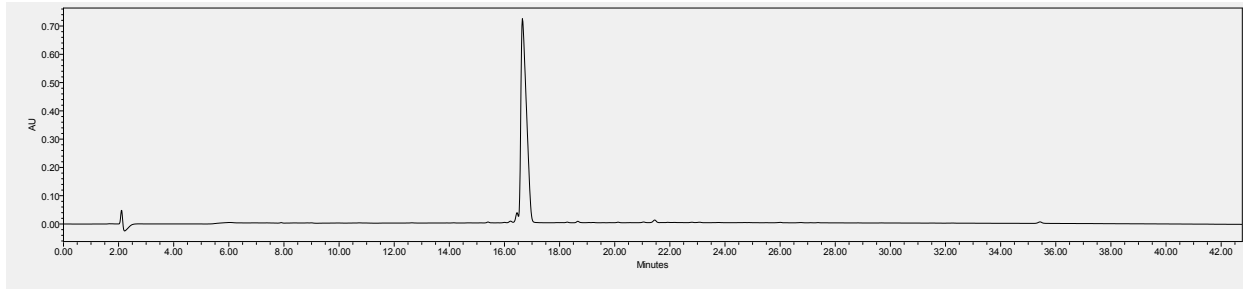

*N,N'*-(((5-((2-octanamidoethyl)carbamoyl)-1,3-phenylene)bis(azanediy1))bis(2-oxoethane-2,1-diy1))bis(3-chloro-*N*-((*S*)-2,6-diaminohexyl)benzamide) (**6**).

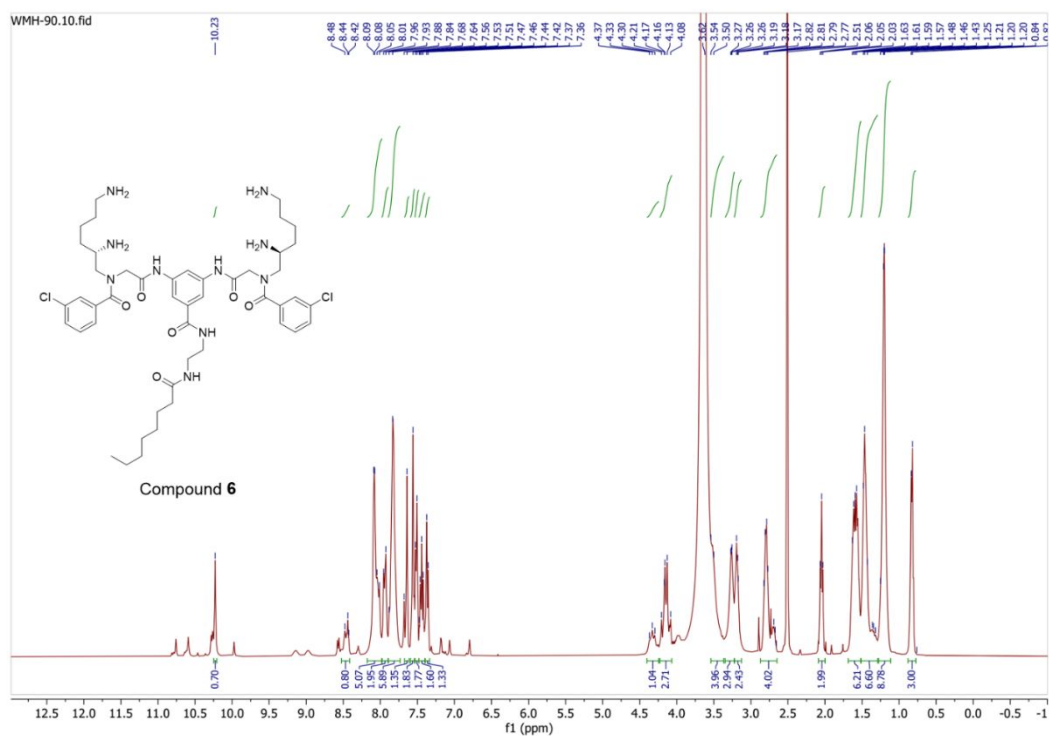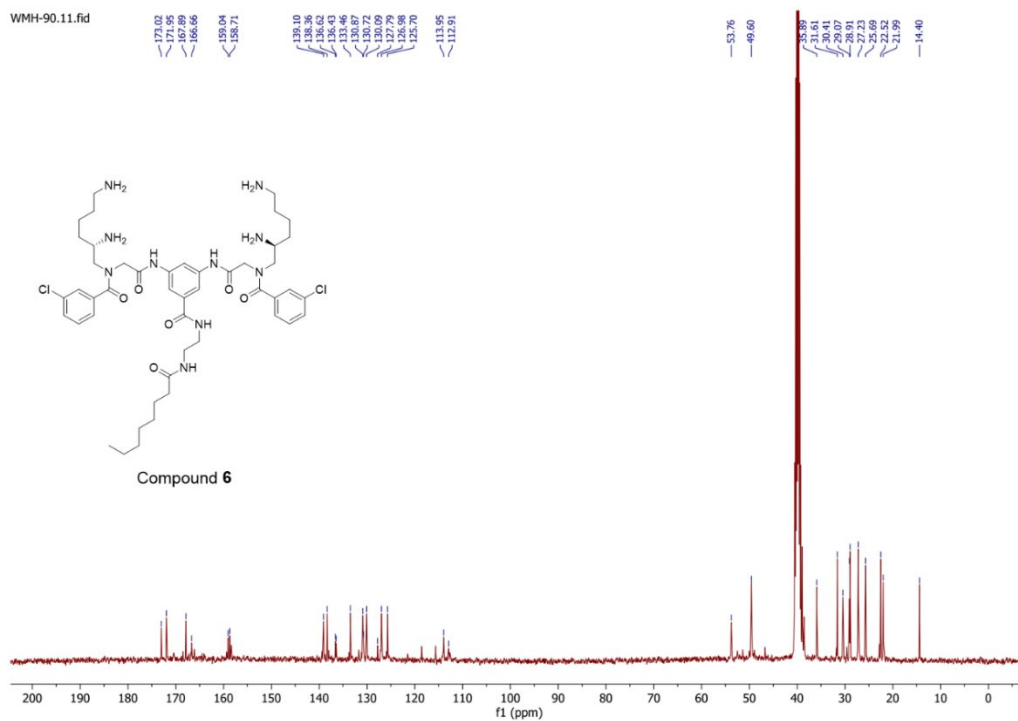



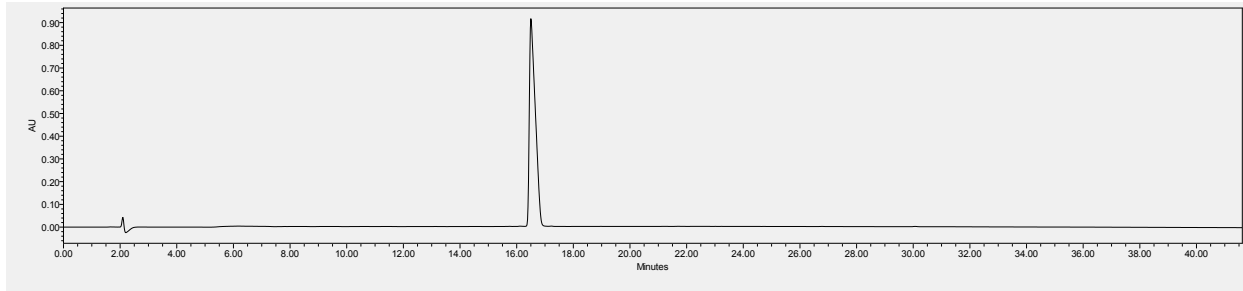

*N,N'*-(((5-((2-octanamidoethyl)carbamoyl)-1,3-phenylene)bis(azanediy))bis(2-oxoethane-2,1-diy))bis(2-((3*S*,5*S*,7*S*)-adamantan-1-yl)-*N*-((*S*)-2,6-diaminohexyl)acetamide) (7).

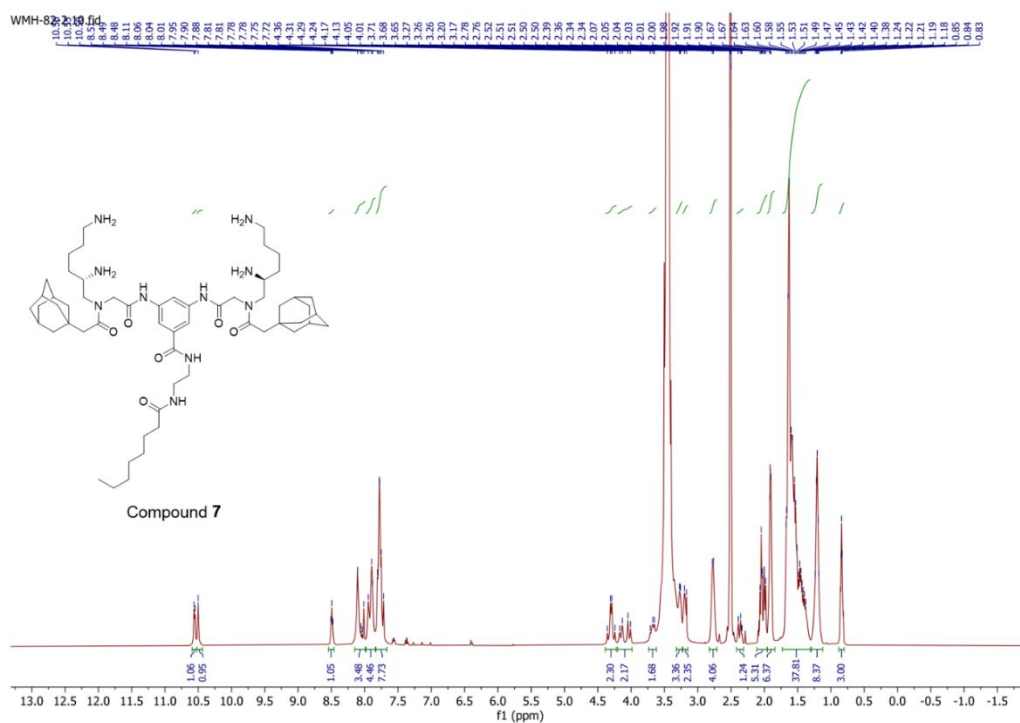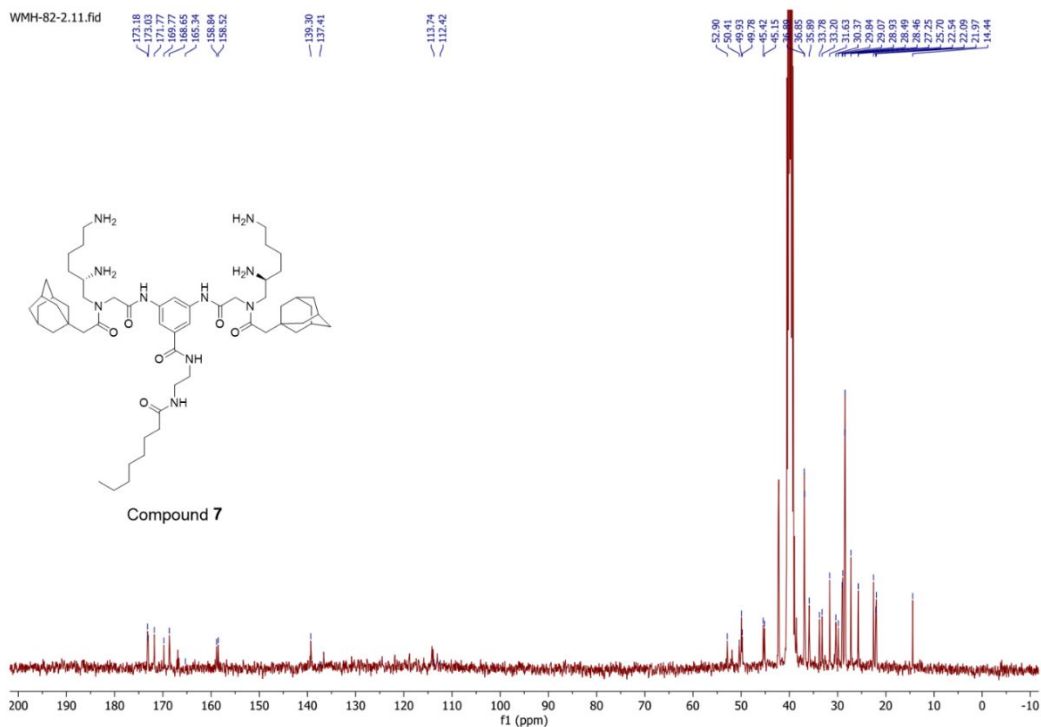

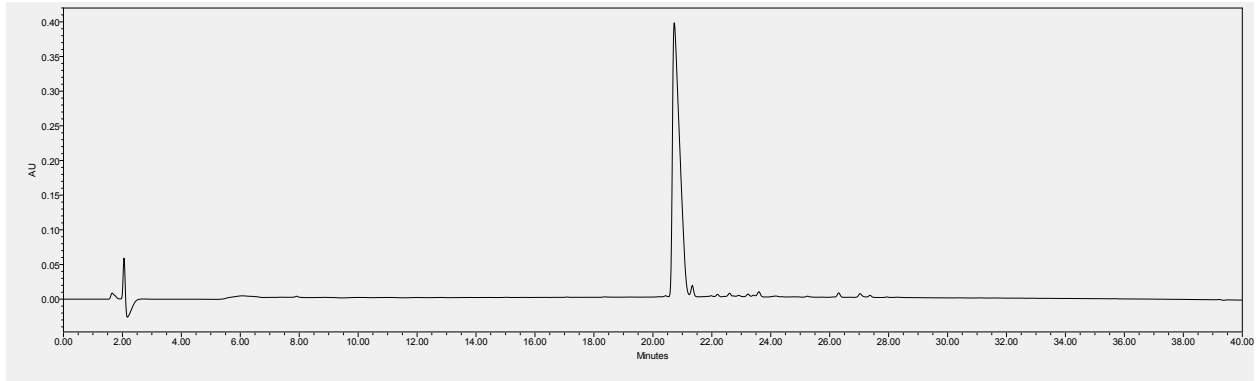

*N,N'*-(((5-((2-decanamidoethyl)carbamoyl)-1,3-phenylene)bis(azanediyl))bis(2-oxoethane-2,1-diy))bis(2-((3*S*,5*S*,7*S*)-adamantan-1-yl)-*N*-((*S*)-2,6-diaminohexyl)acetamide) (**8**).

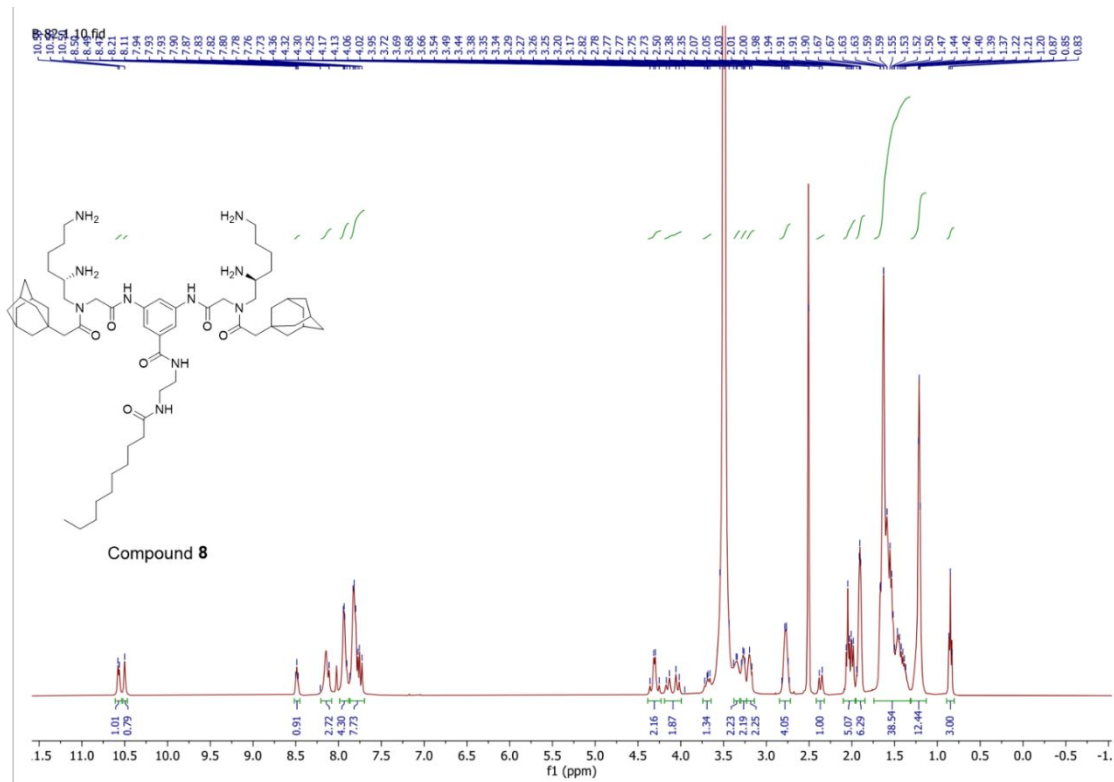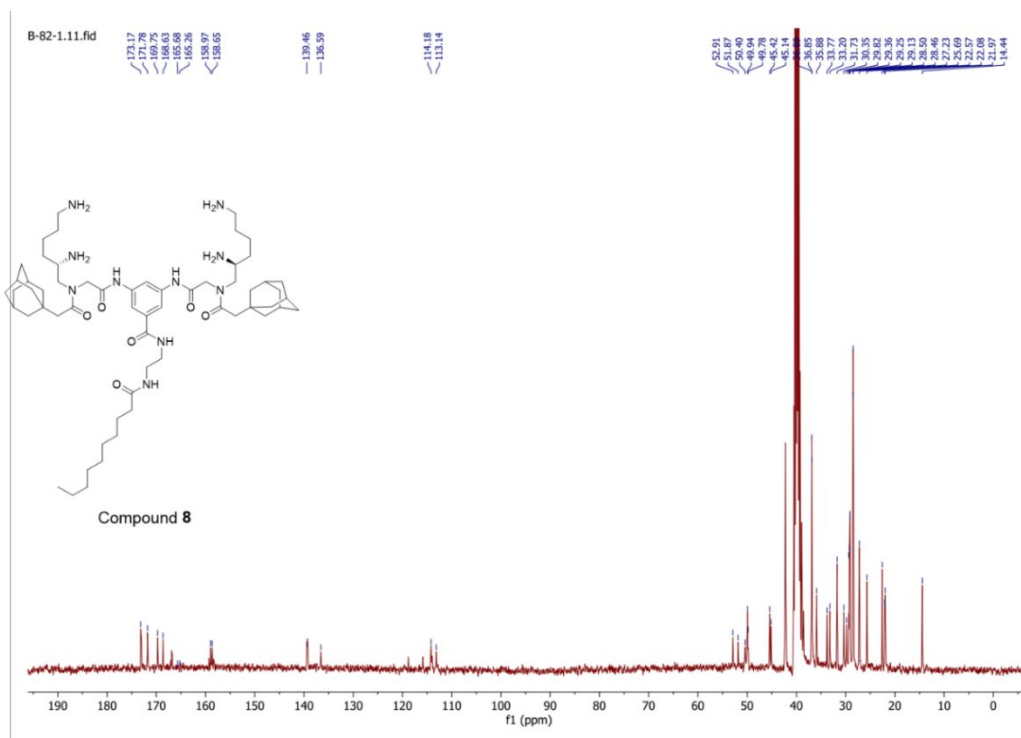

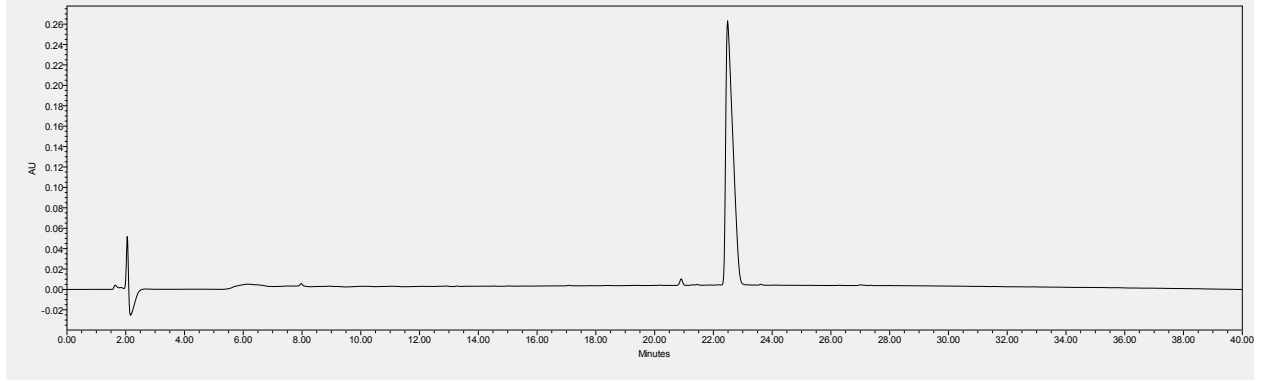

*N,N'*-(((5-((2-dodecanamidoethyl)carbamoyl)-1,3-phenylene)bis(azanediy))bis(2-oxoethane-2,1-diy))bis(2-((3*S*,5*S*,7*S*)-adamantan-1-yl)-*N*-((*S*)-2,6-diaminohexyl)acetamide) (**9**).

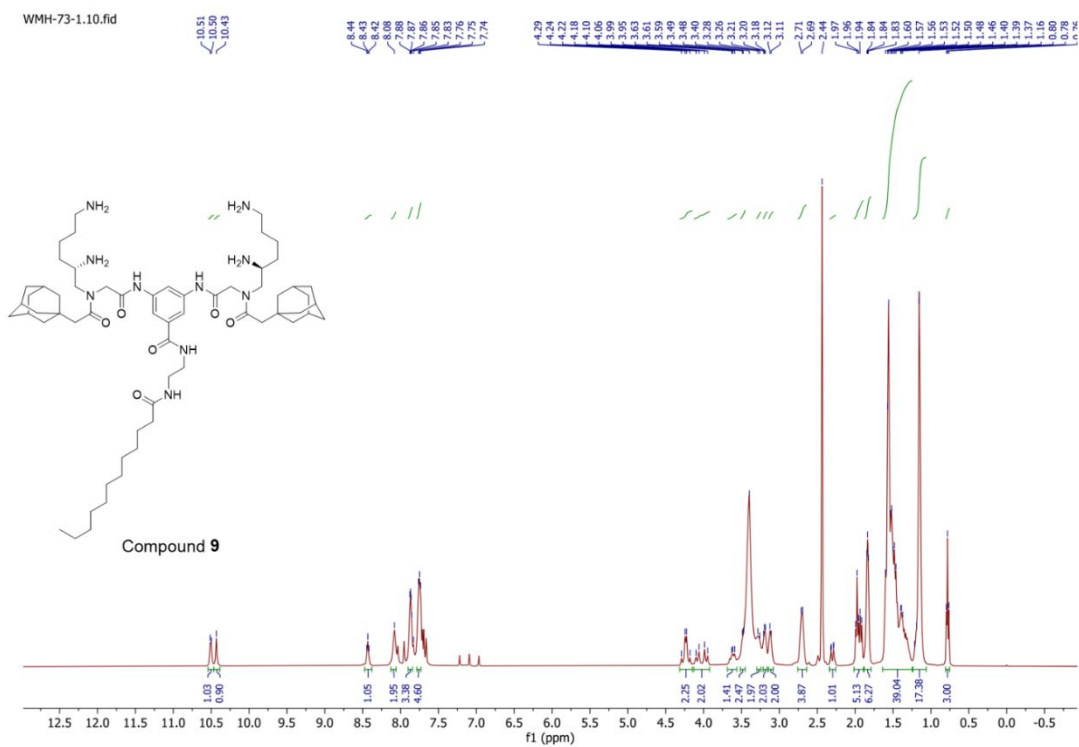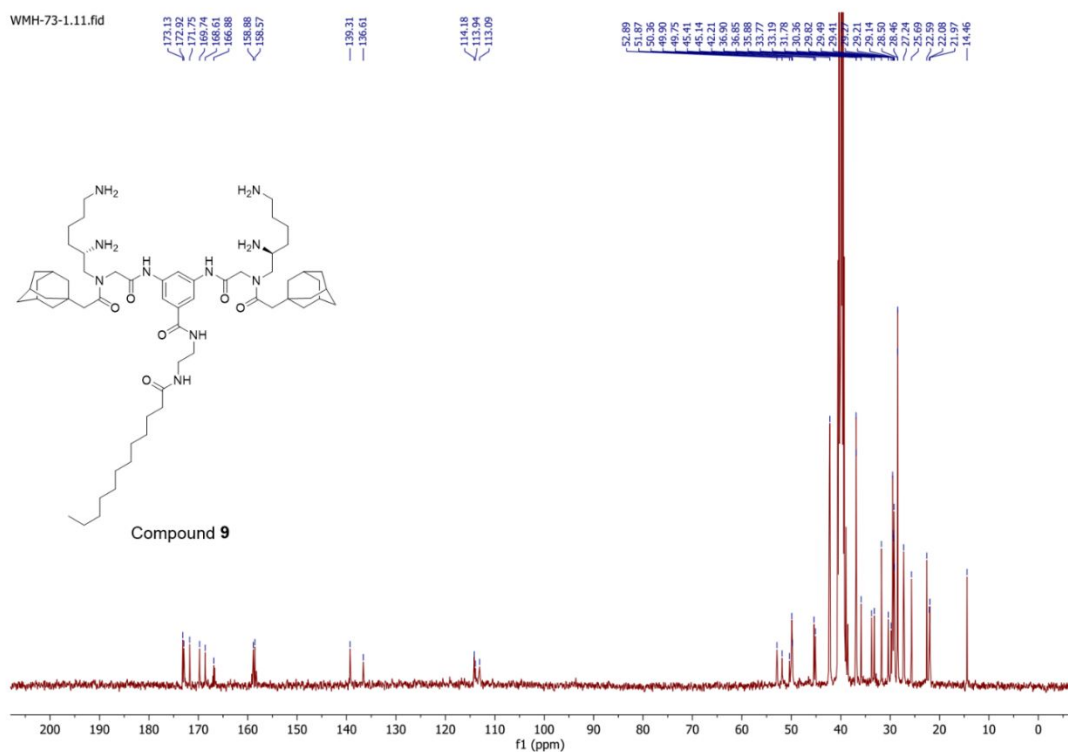

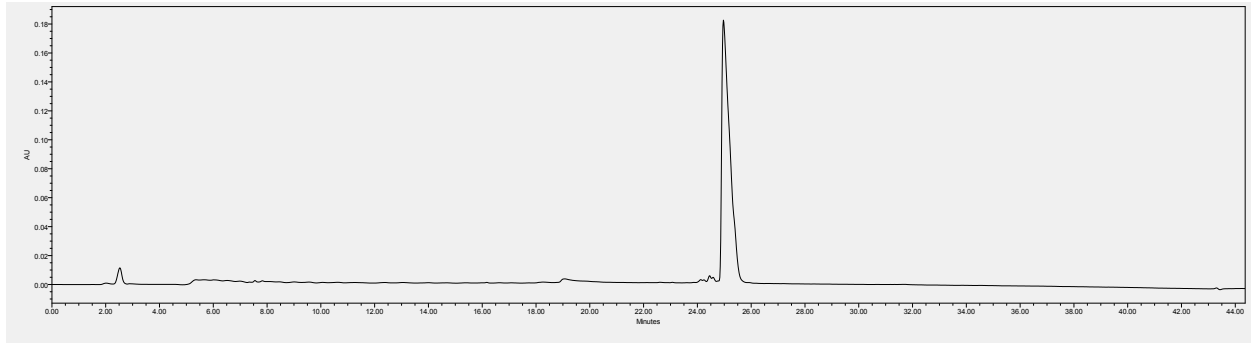

*N,N'*-(((5-((2-dodecanamidoethyl)carbamoyl)-1,3-phenylene)bis(azanediy))bis(2-oxoethane-2,1-diy))bis(*N*-((*S*)-2,6-diaminohexyl)octanamide) (**10**).

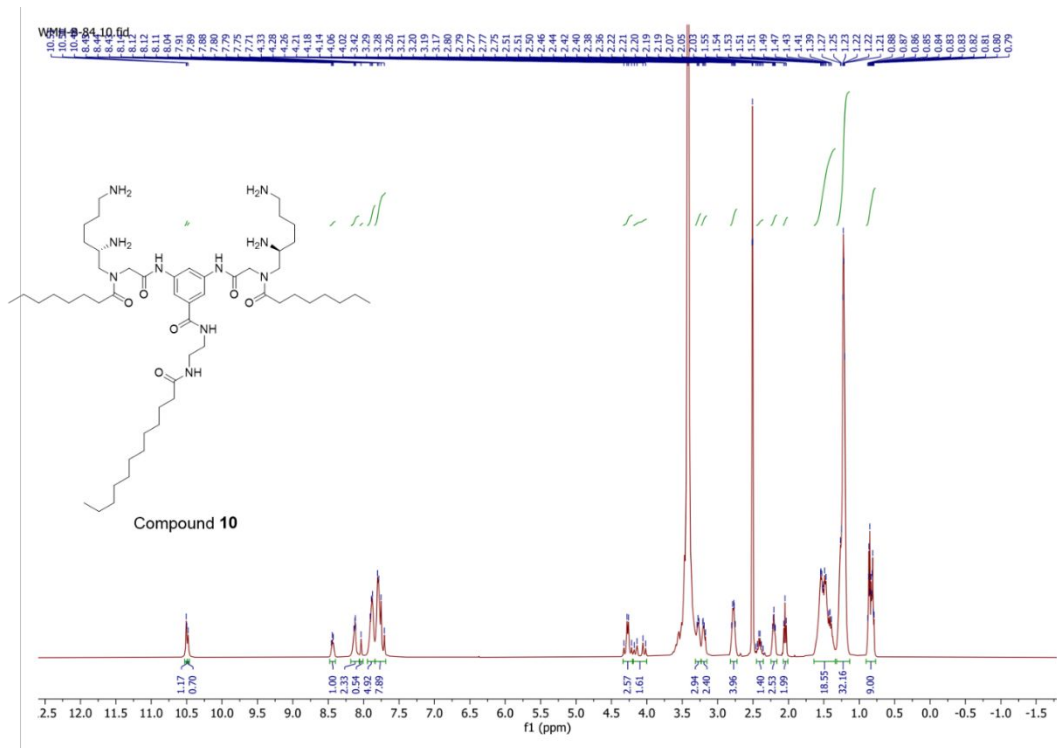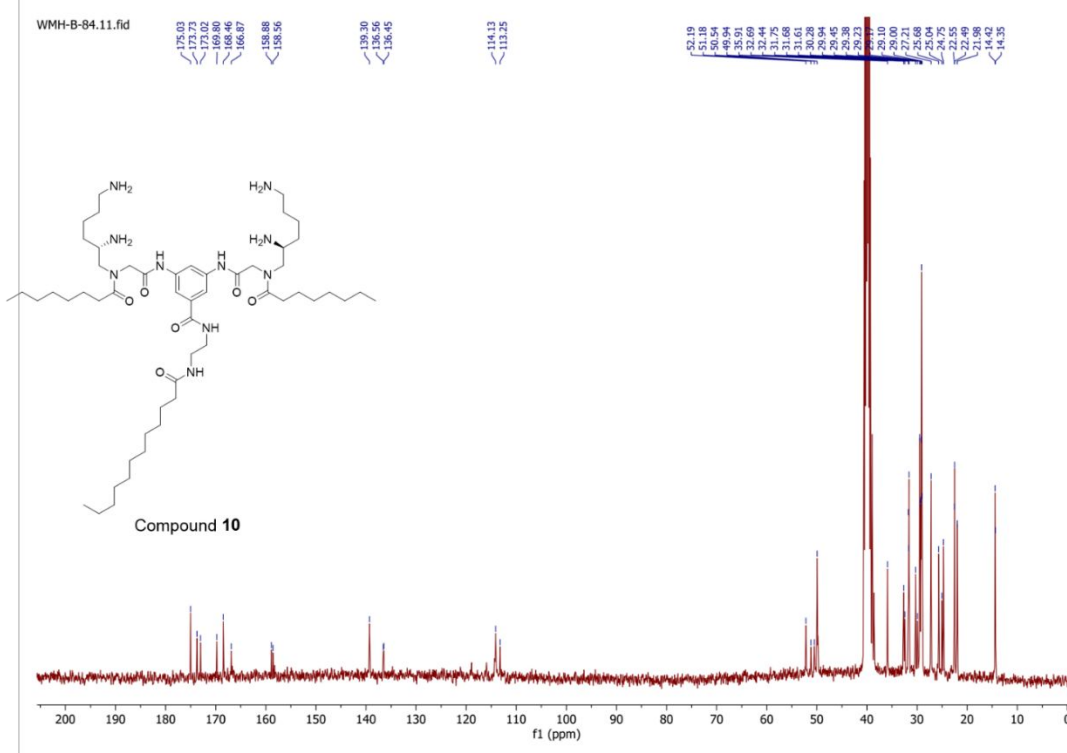



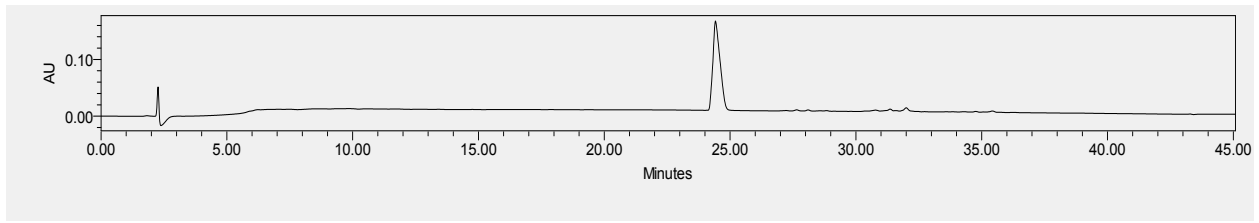

*N,N'*-(5-((2-dodecanamidoethyl)carbamoyl)-1,3-phenylene)bis(2-(((S)-2,6-diaminohexyl)amino)acetamide) (**11**).

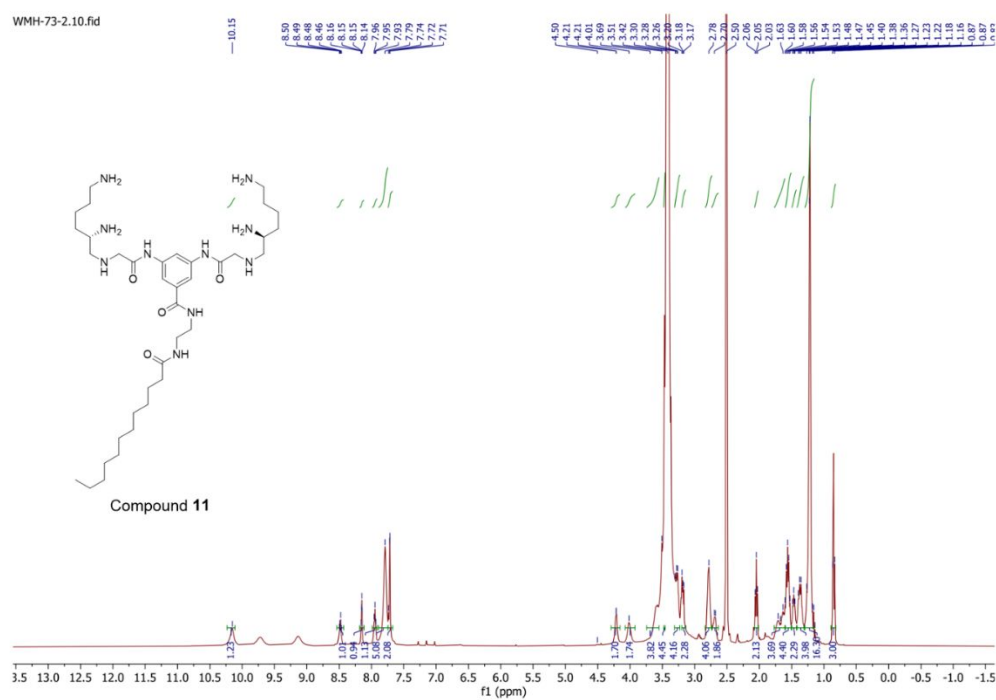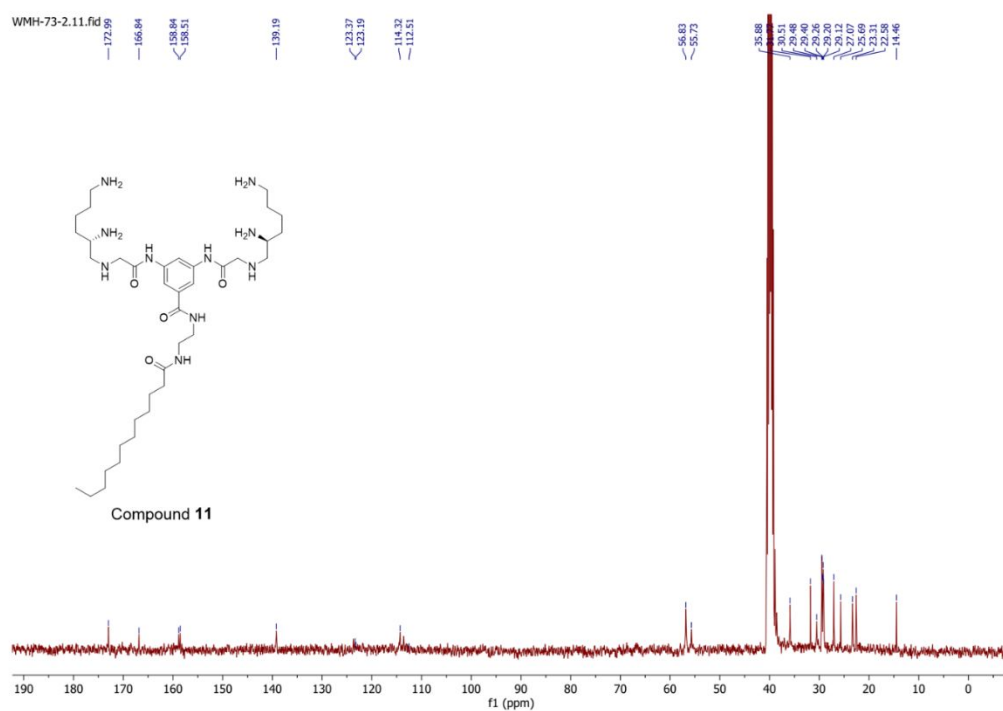

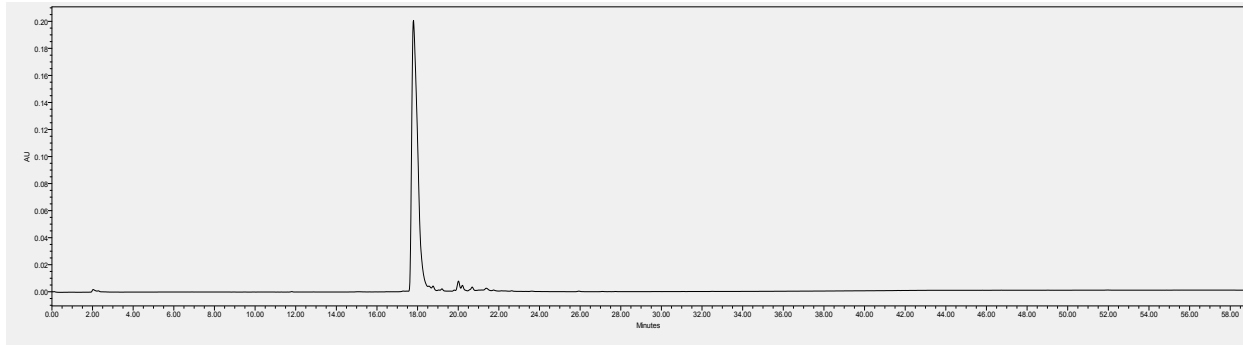

*N,N'*-(((5-((2-(2-((1*s*,3*s*)-adamantan-1-yl)acetamido)ethyl)carbamoyl)-1,3-phenylene)bis(azanediy))bis(2-oxoethane-2,1-diyl))bis(2-((3*S*,5*S*,7*S*)-adamantan-1-yl)-*N*-((*S*)-2,6-diaminohexyl)acetamide) (**12**).

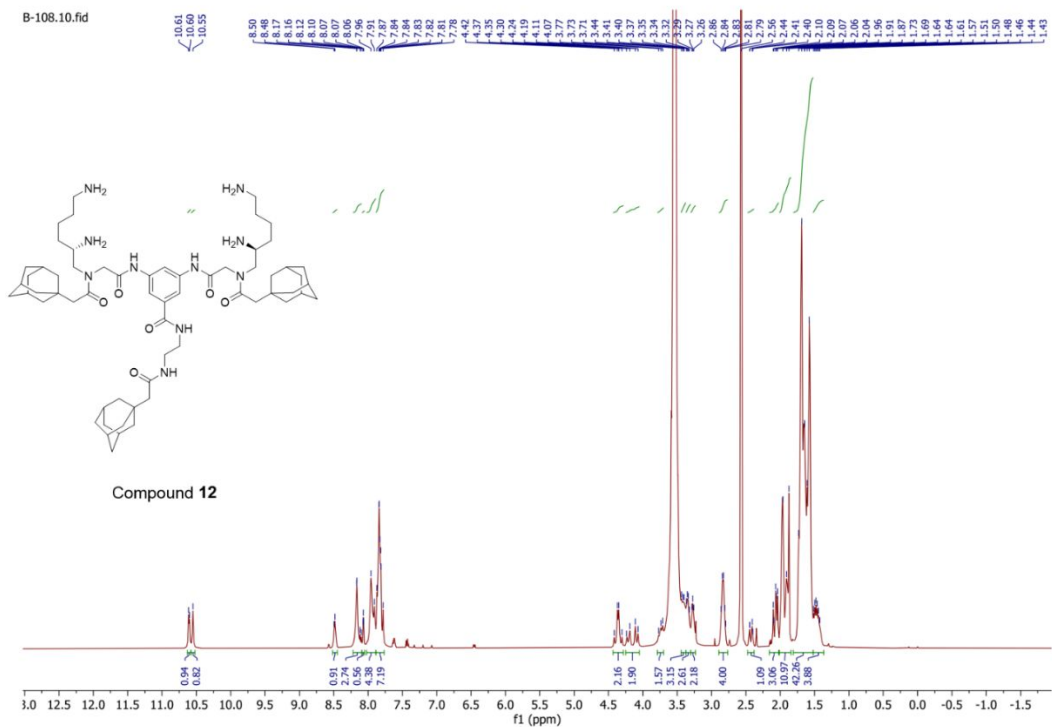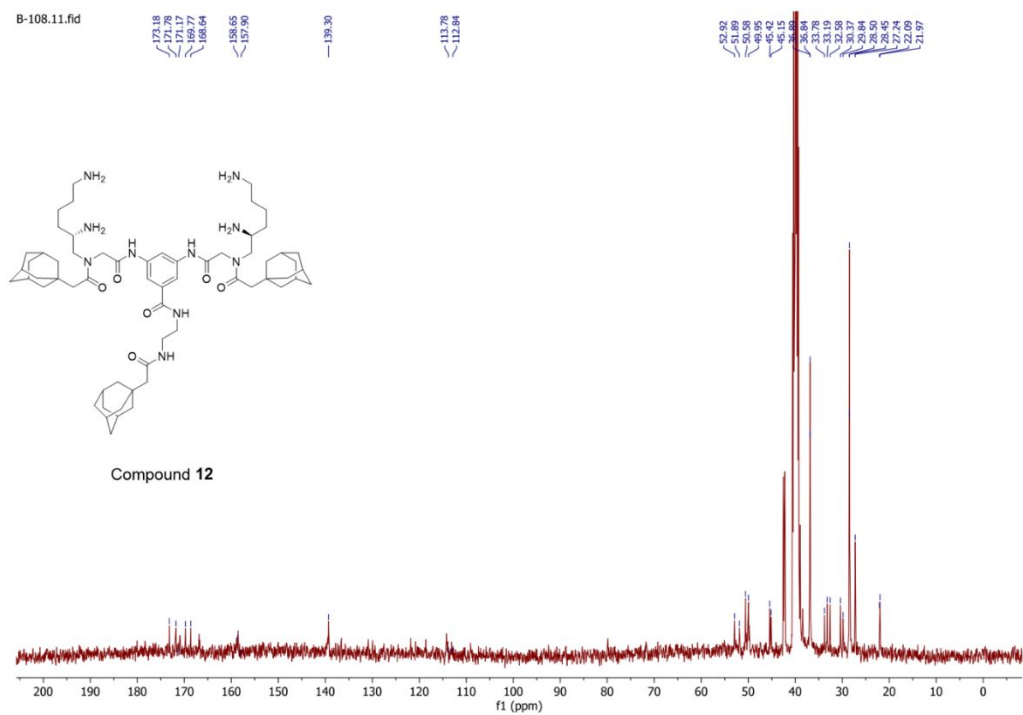

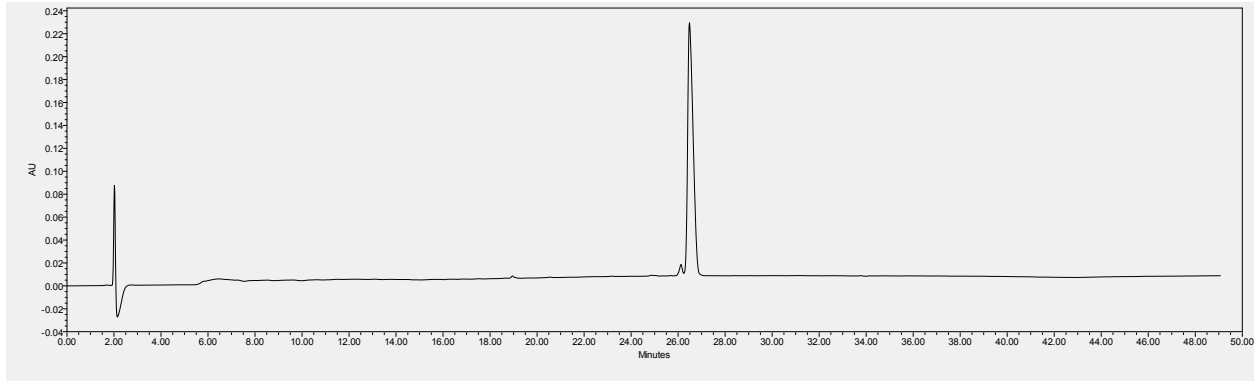

*N,N'*-(((5-(hexylcarbamoyl)-1,3-phenylene)bis(azanediy))bis(2-oxoethane-2,1-diyl))bis(2-((3*S*,5*S*,7*S*)-adamantan-1-yl)-*N*-((*S*)-2,6-diaminohexyl)acetamide) (**13**).

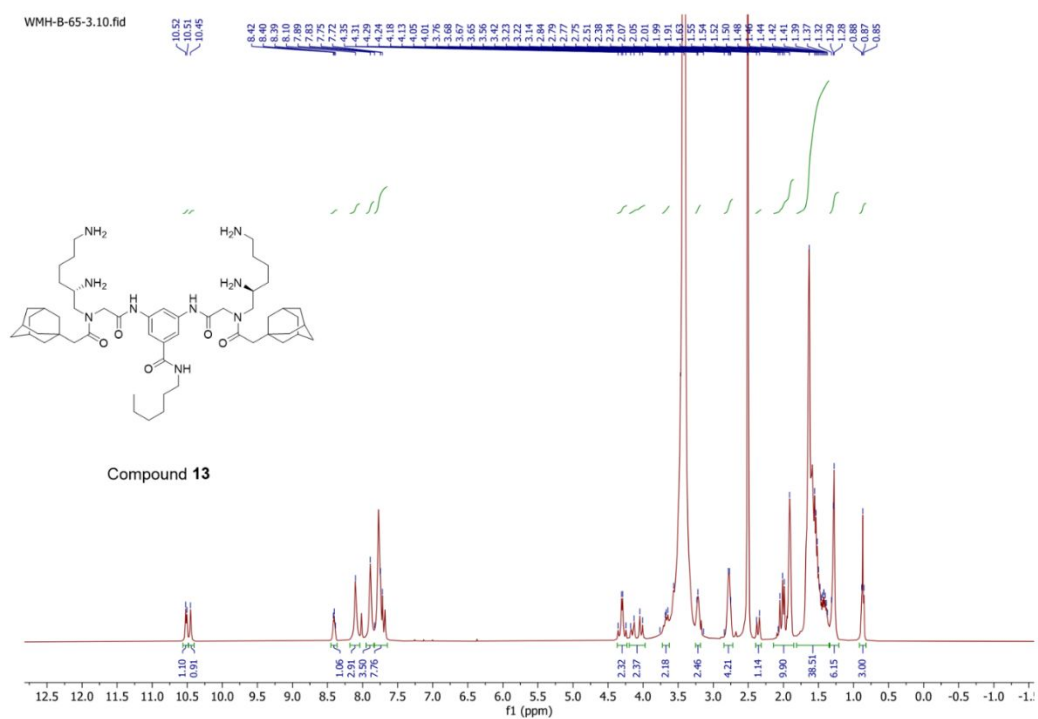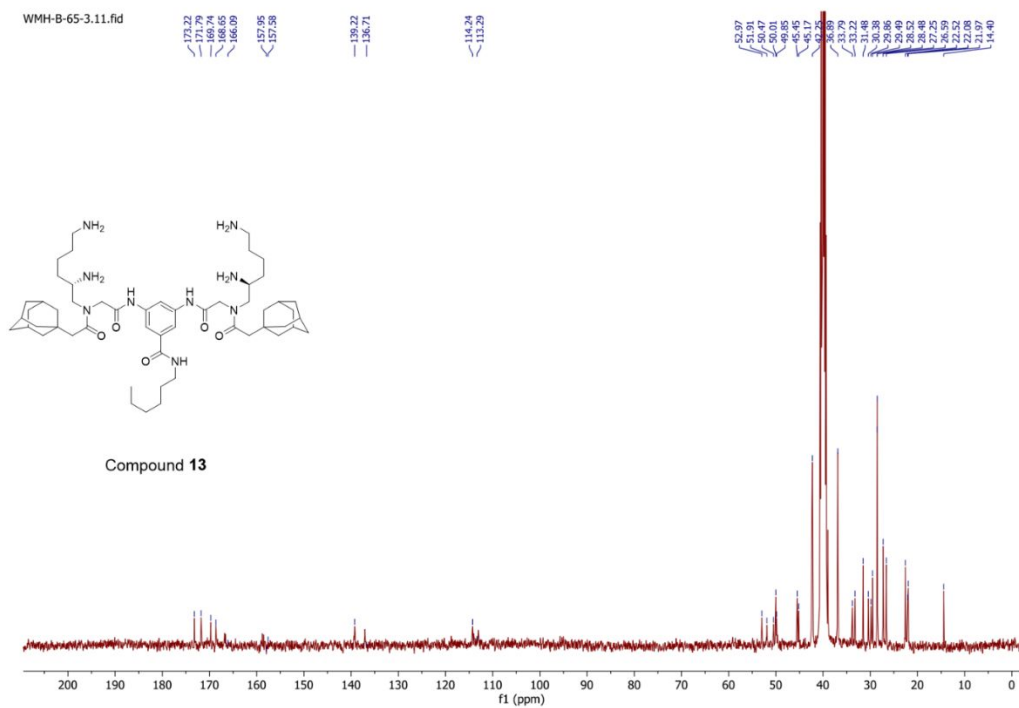

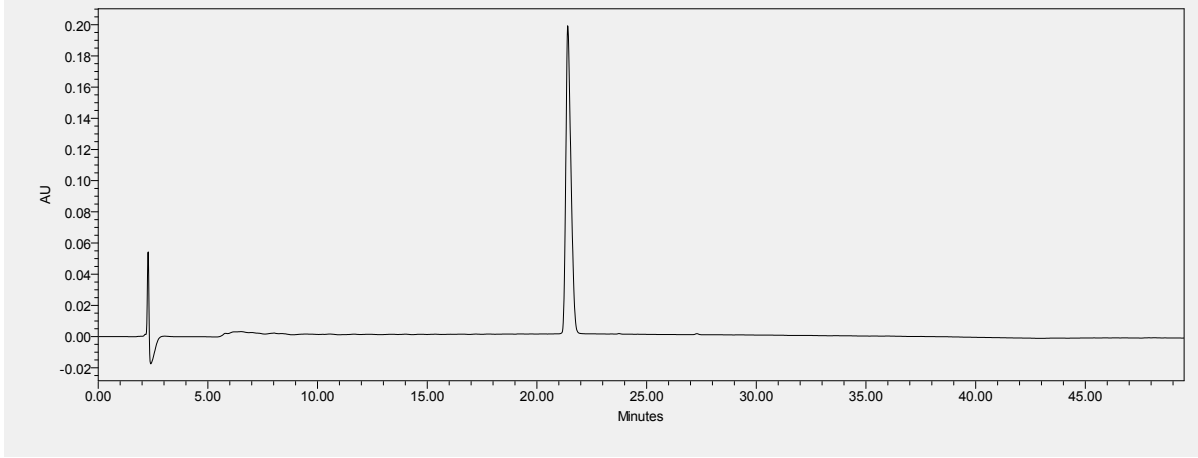

*N,N'*-(((5-(octylcarbamoyl)-1,3-phenylene)bis(azanediy))bis(2-oxoethane-2,1-diyl))bis(2-((3*S*,5*S*,7*S*)-adamantan-1-yl)-*N*-((*S*)-2,6-diaminohexyl)acetamide) (**14**).

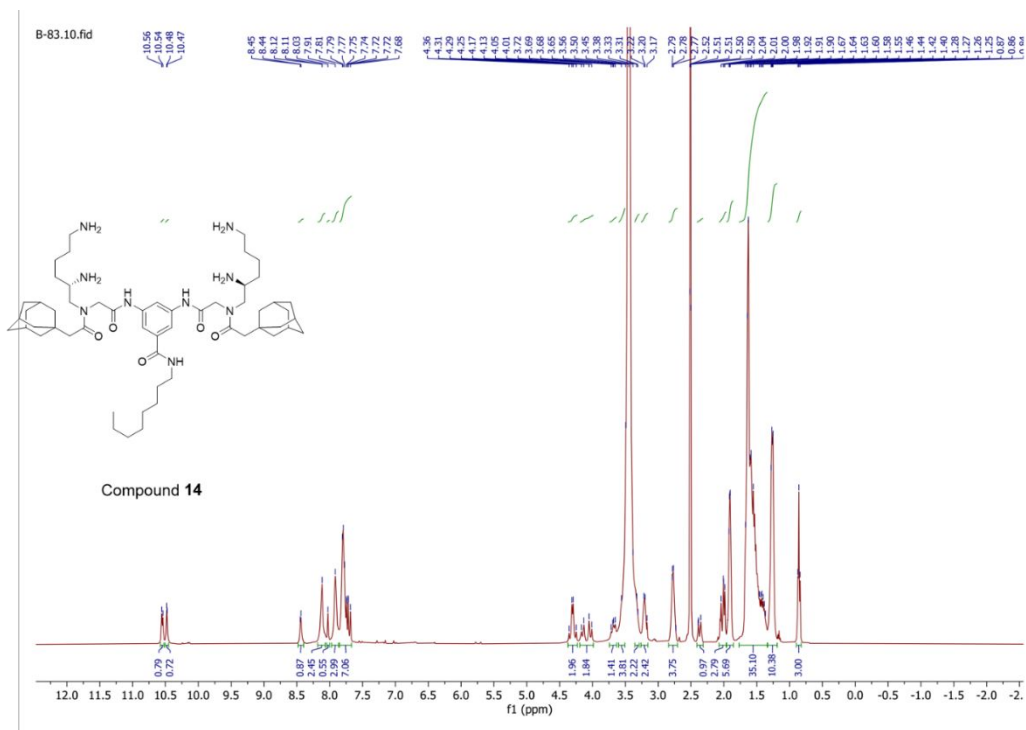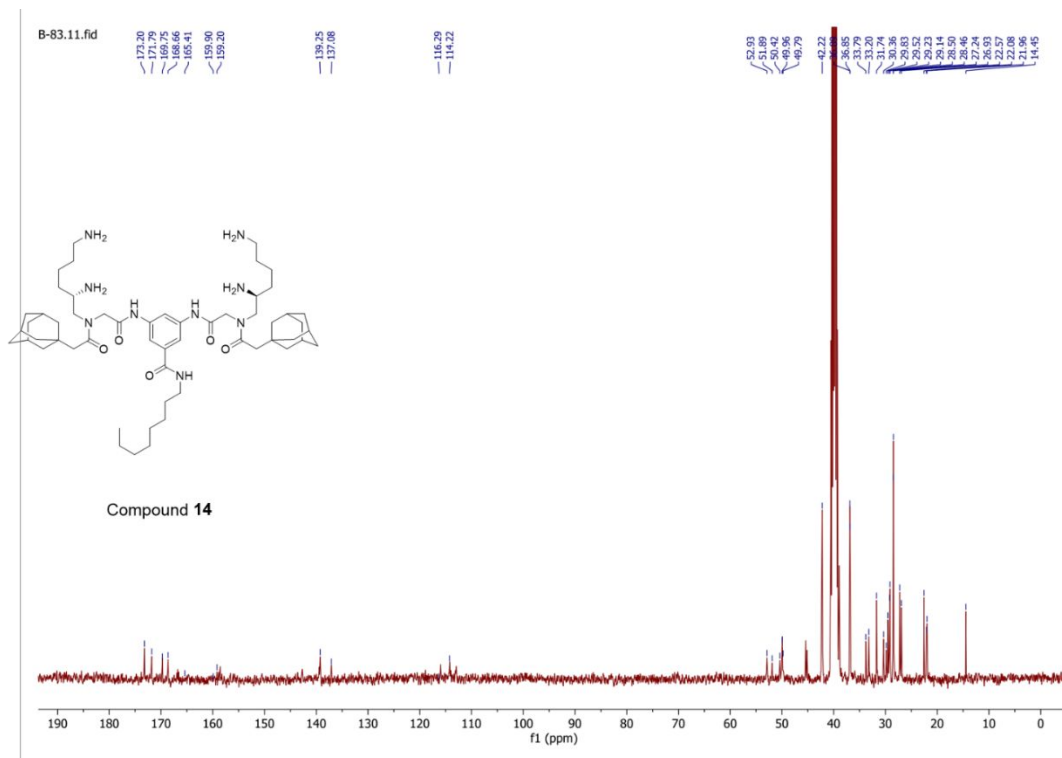



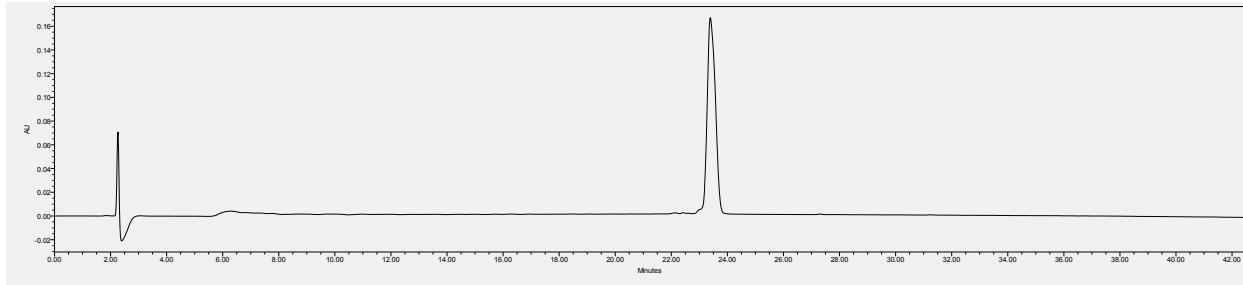

*N,N'*-(((5-(decylcarbamoyl)-1,3-phenylene)bis(azanediy))bis(2-oxoethane-2,1-diyl))bis(2-((3*S*,5*S*,7*S*)-adamantan-1-yl)-*N*-((*S*)-2,6-diaminohexyl)acetamide) (**15**).

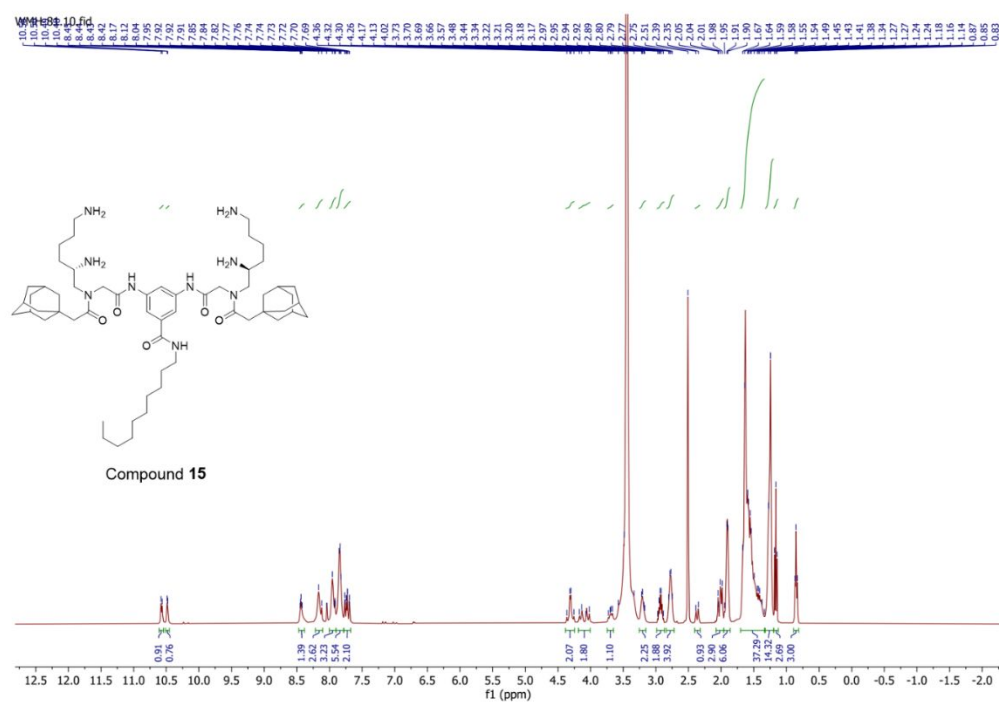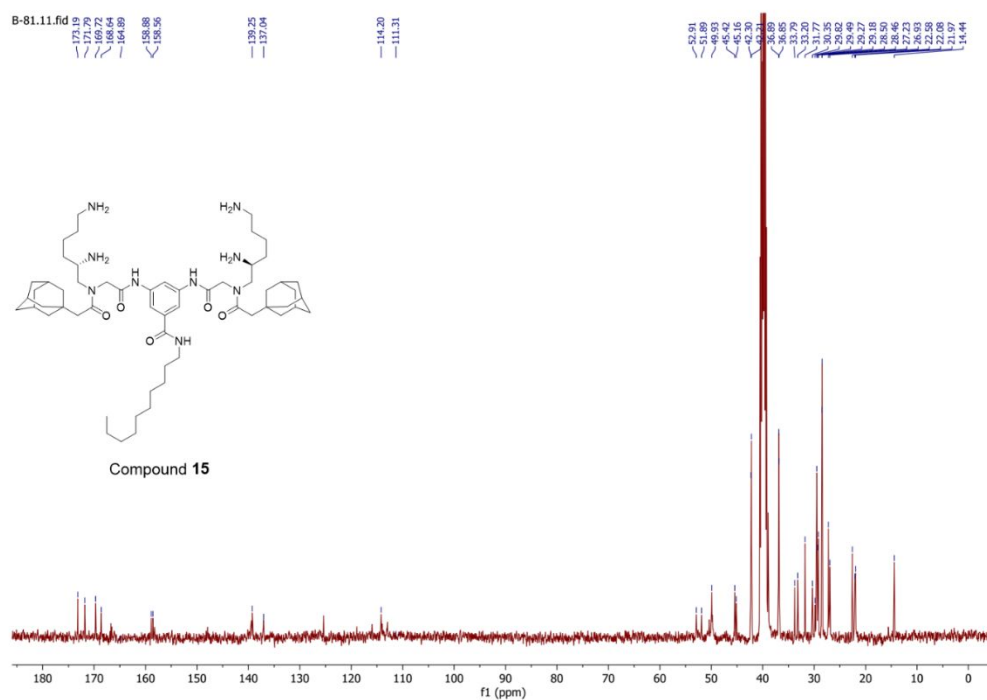

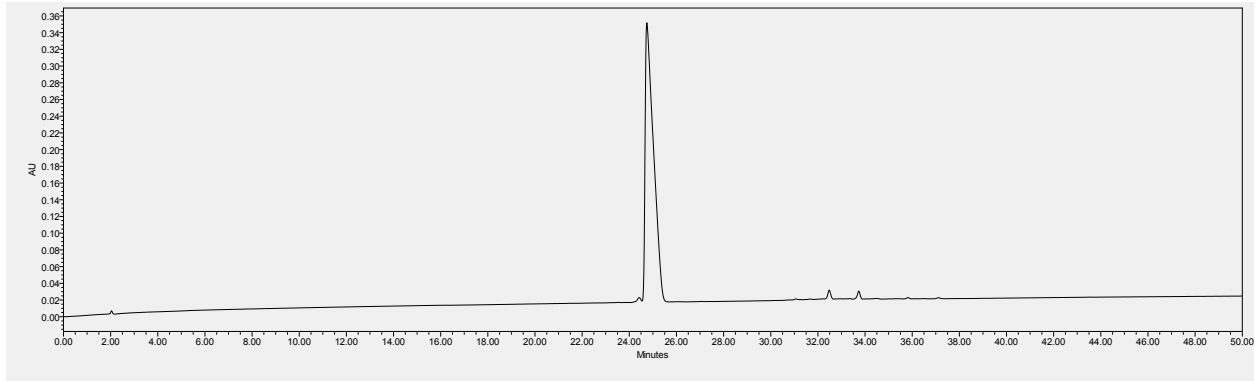

Supplement: NIHMS1781642-supplement-1.pdf [file NIHMS1781642-supplement-1.pdf]
